# Supplementary material
Source: PubMed Central journal article supplement (PMC9773914)
Supplement: NIHMS1837944-supplement-Supplemental_Publication_Material.pdf [file NIHMS1837944-supplement-Supplemental_Publication_Material.pdf]

## SUPPLEMENTAL MATERIAL

**Table S1. Associations of each clinical, laboratory and plaque characteristics with absolute change in lipid core volume and % lipid core.**

| Variable*                                | SD   | Absolute change in<br>lipid core volume |               |         | Absolute change in<br>% lipid core |              |         |
|------------------------------------------|------|-----------------------------------------|---------------|---------|------------------------------------|--------------|---------|
|                                          |      | $\Delta^\dagger$                        | 95% CI        | P-Value | $\Delta^\dagger$                   | 95% CI       | P-Value |
| Lipid core $^\ddagger$ $^\S$             | $\S$ | -3.1                                    | (-7.2, 1.0)   | 0.14    | -0.6                               | (-1.2, -0.1) | 0.019   |
| On-study ERN use                         | -    | 5.7                                     | (-2.6, 13.9)  | 0.17    | 0.5                                | (-0.5, 1.6)  | 0.33    |
| Age, years                               | 9    | 0.0                                     | (-4.2, 4.2)   | 0.99    | 0.4                                | (-0.2, 0.9)  | 0.17    |
| Male sex                                 | -    | -2.0                                    | (-17.2, 13.2) | 0.79    | 0.0                                | (-1.9, 1.9)  | 0.99    |
| Caucasian                                | -    | 11.0                                    | (-6.1, 28.2)  | 0.20    | 2.3                                | (0.1, 4.4)   | 0.041   |
| Total cholesterol, mg/dl                 | 30   | 2.0                                     | (-2.2, 6.2)   | 0.34    | 0.4                                | (-0.1, 0.9)  | 0.15    |
| LDL cholesterol, mg/dl                   | 26   | 0.8                                     | (-3.3, 5.0)   | 0.68    | 0.2                                | (-0.3, 0.8)  | 0.43    |
| Triglycerides $^\ddagger$ , log(mg/dl)   | 0.5  | 1.8                                     | (-2.5, 6.1)   | 0.41    | 0.3                                | (-0.2, 0.9)  | 0.27    |
| HDL cholesterol, mg/dl                   | 5    | 3.2                                     | (-0.9, 7.3)   | 0.12    | 0.5                                | (-0.1, 1.0)  | 0.077   |
| ApoB, mg/dl                              | 24   | 1.8                                     | (-2.4, 6.1)   | 0.40    | 0.3                                | (-0.2, 0.9)  | 0.28    |
| ApoA-1, mg/dl                            | 16   | 1.9                                     | (-2.4, 6.1)   | 0.38    | 0.2                                | (-0.4, 0.7)  | 0.55    |
| Lipoprotein(a) $^\ddagger$ , log(nmol/L) | 2.2  | 5.0                                     | (0.9, 9.0)    | 0.018   | 0.7                                | (0.1, 1.2)   | 0.012   |
| Calcification                            | -    | 8.5                                     | (-0.1, 17.1)  | 0.051   | 1.0                                | (-0.2, 2.1)  | 0.094   |
| Intraplaque hemorrhage                   | -    | 27.2                                    | (15.4, 39.0)  | <0.001  | 4.3                                | (3.1, 5.5)   | <0.001  |

ERN: extended-release niacin, LDL: low-density lipoprotein, HDL: high-density lipoprotein.

\* Linear regression model with the baseline lipid core variable (log-transformed) and on-study ERN use;

† Difference in annualized absolute change of lipid core volume or % lipid core per 1-SD increase (continuous baseline variables) or between groups (categorical baseline variables);

‡ Log-transformed prior to inclusion in the model;

§ Baseline lipid core volume for change in lipid core volume (SD: 2 log(mm<sup>3</sup>)) and baseline % lipid core for change in % lipid core (SD: 1.4 log(%)).
